# Supplementary material
Source: PubMed Central journal article supplement (PMC1865580)
Supplement: msb4100138-s1.pdf [file msb4100138-s1.pdf]

## Supplementary Figures

Supplementary Figure 1

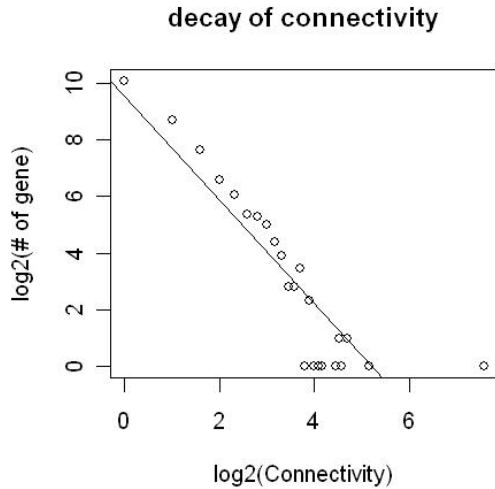

Supplementary Figure 1. The power law decay of the number of genes with the degree of connectivity. The X-axis is the log<sub>2</sub> of connectivity, and the Y-axis is the log<sub>2</sub> of number of genes with each degree of connectivity. There is a linear relationship in this log-log plot represented by the line of linear regression between X and Y axis.

Supplementary Figure 2

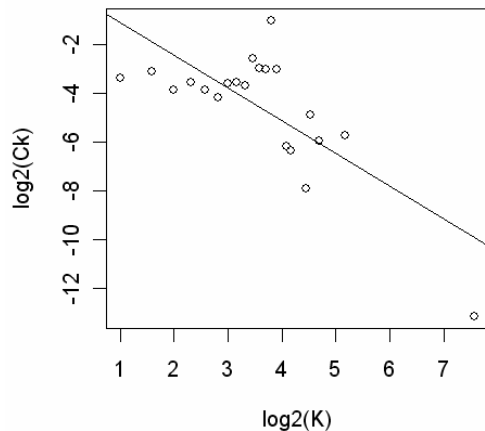

Supplementary Figure 2. The power law decay of the average clustering coefficient (C<sub>k</sub>) with the degree of connectivity. The X-axis is the log<sub>2</sub> of connectivity, and the Y-axis is the log<sub>2</sub> of average clustering coefficient of genes with the same degree of connectivity. There is a correlation in this log-log plot represented by the line of linear regression between X and Y axis.

Supplementary Figure 3

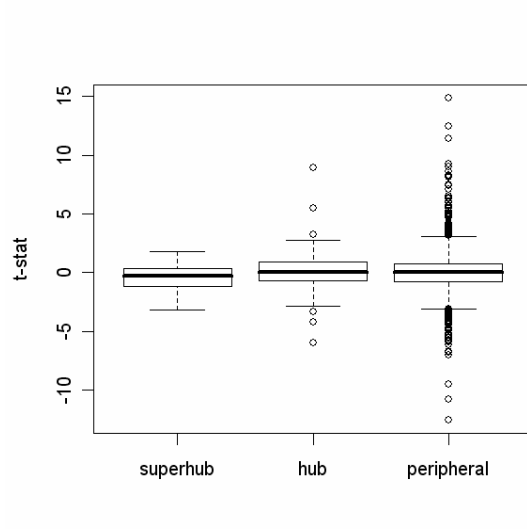

Supplementary Figure 3. Boxplot of the t-statistics of superhub genes, hub genes and peripheral (non-hub) genes in the network.
